# Supplementary material for: A systematic scoping review of health-promoting interventions for contact centre employees examined through a behaviour change wheel lens
Source: PubMed Central journal article supplement (PMC10923409; doi:10.1371/journal.pone.0298150), 2024-03-08
Supplement: pone.0298150.s003.pdf [file pone.0298150.s003.pdf]

## **S3 File – Data Extraction Tool**

### **Evidence Source Details and Characteristics**

Citation details e.g. author/s, year, title, journal/company, URL

### **Details/Results Extracted from Source of Evidence**

Country

Setting (available details of contact centre e.g. organisational level/structure/ type)

Participants details e.g. number, details (eligibility), demographics

Source purpose and aims (broad)

Methodology design/ Recruitment design/ Data analysis

Key characteristics of health intervention/ policy document

Authors' conclusions (Effectiveness? Feasibility? Acceptability? Recommendation?)
