# Supplementary material for: A systematic scoping review of health-promoting interventions for contact centre employees examined through a behaviour change wheel lens
Source: PubMed Central journal article supplement (PMC10923409; doi:10.1371/journal.pone.0298150), 2024-03-08
Supplement: pone.0298150.s007.pdf [file pone.0298150.s007.pdf]

**S3 Table: Risk of Bias assessment tables**

| Risk of bias assessment for interventions with a quasi-experimental design |             |                           |                                 |                                        |                      |                            |                                   |
|----------------------------------------------------------------------------|-------------|---------------------------|---------------------------------|----------------------------------------|----------------------|----------------------------|-----------------------------------|
| Study                                                                      | Confounding | Selection of participants | Classification of interventions | Deviations from intended interventions | Missing outcome data | Measurement of the outcome | Selection of the reported results |
| Chau et al (2015) [58]                                                     | Low         | Low                       | Low                             | Some concerns                          | Low                  | Low                        | Low                               |
| Garrett (2016) [53]                                                        | High        | Low                       | Low                             | Low                                    | Low                  | Low                        | Low                               |
| Holman et al (2009) [48]                                                   | High        | Low                       | Low                             | Low                                    | Low                  | Some concerns              | Low                               |
| Holman & Axtell (2016) [60]                                                | Low         | Low                       | Low                             | Some concerns                          | Low                  | Low                        | Low                               |
| Kirk et al (2013) – Study 1 [41]                                           | High        | Low                       | High                            | No information                         | No information       | Some concerns              | Low                               |
| Kirk et al (2013) – Study 1 [41]                                           | High        | Low                       | High                            | No information                         | No information       | Some concerns              | Low                               |
| Pickens et al (2016) [62]                                                  | Low         | Low                       | Low                             | Some concerns                          | Low                  | Some concerns              | Low                               |
| Schneider et al (2012) [63]                                                | High        | Low                       | Low                             | Low                                    | Low                  | Low                        | Low                               |

| Risk of bias assessment for interventions with a randomised or cluster-randomised-controlled design |                       |                                                    |                                                   |                      |                            |                                   |
|-----------------------------------------------------------------------------------------------------|-----------------------|----------------------------------------------------|---------------------------------------------------|----------------------|----------------------------|-----------------------------------|
| Study                                                                                               | Randomisation process | Deviation from intended interventions (assignment) | Deviation from intended interventions (adherence) | Missing outcome data | Measurement of the outcome | Selection of the reported results |
| Allexandre et al (2016) [49]                                                                        | Low                   | Low                                                | High                                              | Low                  | Some concerns              | Low                               |
| Cook et al (2004) [59]                                                                              | Low                   | Low                                                | Low                                               | Low                  | Some concerns              | Low                               |
| Krajewski, Wieland & Sauerland (2010) [42]                                                          | Low                   | Low                                                | High                                              | Low                  | Some concerns              | Low                               |
| Krajewski, Sauerland & Rainer (2011) [43]                                                           | Low                   | Low                                                | Low                                               | Low                  | Low                        | Low                               |
| Morris et al (2021) [10]                                                                            | Low                   | Low                                                | Low                                               | Low                  | Low                        | Low                               |
| Rempel et al (2006) [50]                                                                            | Low                   | Low                                                | Low                                               | Low                  | Some concerns              | Low                               |
| Workman & Bommer (2004) [64]                                                                        | Low                   | Low                                                | Low                                               | Low                  | Low                        | Low                               |
| Mishra et al (2010) [44]                                                                            | Low                   | Some concerns                                      | Low                                               | Low                  | Low                        | Some concerns                     |
| Bond et al (2008) [57]                                                                              | Low                   | Low                                                | Low                                               | Low                  | Low                        | Low                               |
| Workman (2003) [55]                                                                                 | Some concerns         | Low                                                | Low                                               | Low                  | Some concerns              | Low                               |

| Risk of bias assessment for interventions with a pre-post study design |                |                                           |                                                                       |                                    |              |                                |                                                         |                               |                |                      |                           |                                                                |         |
|------------------------------------------------------------------------|----------------|-------------------------------------------|-----------------------------------------------------------------------|------------------------------------|--------------|--------------------------------|---------------------------------------------------------|-------------------------------|----------------|----------------------|---------------------------|----------------------------------------------------------------|---------|
| Study                                                                  | Study question | Eligibility criteria and study population | Study participants representative of clinical populations of interest | All eligible participants enrolled | Sample size  | Intervention clearly described | Outcome measures clearly described, valid, and reliable | Blinding of outcome assessors | Follow-up rate | Statistical analysis | Multiple outcome measures | Group-level interventions and individual-level outcome efforts | Overall |
| Chi & Lin (2009) [4]                                                   | Yes            | Yes                                       | No                                                                    | Not reported                       | Not reported | Yes                            | Yes                                                     | Not applicable                | Yes            | Yes                  | Yes                       | Not applicable                                                 | Fair    |
| Kennedy & Pretorius (2008) [9]                                         | Yes            | Yes                                       | Yes                                                                   | Not reported                       | Not reported | Yes                            | No                                                      | Not applicable                | Yes            | Yes                  | Yes                       | Not applicable                                                 | Fair    |
| Lehto et al (2003) [13]                                                | Yes            | Yes                                       | Yes                                                                   | Not reported                       | Not reported | Yes                            | No                                                      | Not applicable                | Yes            | Yes                  | No                        | Not applicable                                                 | Fair    |
| Sharifi, Denesh and Gholamnia (2022) [20]                              | Yes            | Yes                                       | No                                                                    | Yes                                | Not reported | Yes                            | Yes                                                     | Not applicable                | Yes            | Yes                  | No                        | Not applicable                                                 | Fair    |
| Tham (2004) [21]                                                       | Yes            | No                                        | No                                                                    | Not reported                       | Not reported | Yes                            | No                                                      | Not applicable                | Not reported   | Yes                  | Yes                       | Yes                                                            | Poor    |
| Thatcher at al (2020) study 1 [22]                                     | Yes            | Yes                                       | No                                                                    | Yes                                | Yes          | Yes                            | Yes                                                     | Not applicable                | No             | Yes                  | No                        | Yes                                                            | Fair    |
| Thatcher at al (2020) study 2 [22]                                     | Yes            | Yes                                       | No                                                                    | Yes                                | Yes          | Yes                            | No                                                      | Not applicable                | No             | Yes                  | No                        | Yes                                                            | Poor    |

|                                              |     |     |              |              |              |     |     |                |                 |     |     |                |      |
|----------------------------------------------|-----|-----|--------------|--------------|--------------|-----|-----|----------------|-----------------|-----|-----|----------------|------|
| <b>Wargocki, Wyon and Fanger (2004) [23]</b> | Yes | No  | Not reported | Not reported | Not reported | Yes | No  | Not applicable | Can't determine | Yes | Yes | Yes            | Poor |
| <b>Yesilyurt &amp; Yelken (2020) [26]</b>    | Yes | Yes | No           | Yes          | Not reported | Yes | Yes | Not applicable | Yes             | Yes | No  | Not applicable | Fair |
