# Supplementary material for: A systematic scoping review of health-promoting interventions for contact centre employees examined through a behaviour change wheel lens
Source: PLoS One. 2024 Mar 8;19(3):e0298150. doi: 10.1371/journal.pone.0298150 (PMC10923409; doi:10.1371/journal.pone.0298150)
Supplement: S2 Table — (PDF) [file pone.0298150.s006.pdf]

**S2 Table - Characteristics Table for the 28 Included Intervention Studies**

| Characteristics of the 28 included intervention studies (from 26 intervention articles)                          |                                                                                                    |          |                      |                                                                            |                                                                                                                                                                                                                                                                                                                                                                                                                                                                                                                                                                                                                                                                                                                                                                                                                                                                          |                                                            |                                                    |                                                                      |                                                                                                                                                |
|------------------------------------------------------------------------------------------------------------------|----------------------------------------------------------------------------------------------------|----------|----------------------|----------------------------------------------------------------------------|--------------------------------------------------------------------------------------------------------------------------------------------------------------------------------------------------------------------------------------------------------------------------------------------------------------------------------------------------------------------------------------------------------------------------------------------------------------------------------------------------------------------------------------------------------------------------------------------------------------------------------------------------------------------------------------------------------------------------------------------------------------------------------------------------------------------------------------------------------------------------|------------------------------------------------------------|----------------------------------------------------|----------------------------------------------------------------------|------------------------------------------------------------------------------------------------------------------------------------------------|
| Study Details                                                                                                    |                                                                                                    |          | Intervention Details |                                                                            |                                                                                                                                                                                                                                                                                                                                                                                                                                                                                                                                                                                                                                                                                                                                                                                                                                                                          |                                                            |                                                    |                                                                      |                                                                                                                                                |
| Authors (Year); Country; Contact centre details*                                                                 | Population                                                                                         | Design** | Duration             | Data collection time point(s)                                              | Intervention delivery (setting)***                                                                                                                                                                                                                                                                                                                                                                                                                                                                                                                                                                                                                                                                                                                                                                                                                                       | Theoretical underpinning                                   | Intervention aim(s)                                | Primary outcome(s)                                                   | Other outcome(s)                                                                                                                               |
| <b>Allexandre et al (2016); USA; Corporate call centre [1]</b>                                                   | - Contact centre advisors<br>- N=161; 83.2% female<br>- Mean age: 40 years (SD 13)<br>- 77% C/W    | RCT      | 8 weeks              | Baseline, 8 and 16 weeks, and 1-year                                       | <b>I1 (hybrid):</b> Ed/T/P (weekly mindfulness themes and meditation techniques taught through written and audio formats; educational articles (e.g., mindfulness in everyday eating) and x2 email reminders).<br><b>I2 (office for meetings; hybrid for I1):</b> Ed/T/P (as I1) and En (followed by face-to-face group meetings, 1h x1 per week x 8 weeks; discussion and sharing positive experiences).<br>- <i>Delivered by selected company employees who participated in the web-based programme before the start of the study.</i><br><b>I3 (office for meetings; hybrid for I1):</b> Ed/T/P (as I1) and En (Face-to-face group meeting, discussion facilitated by clinical support on week 3, 6 and 8.)<br>- <i>Delivered by a clinical counsellor or licensed social worker).</i><br><b>C (office):</b> Waitlist control filling in outcome questionnaires only. | Based on mindfulness meditation principles                 | Increase mindfulness to reduce workplace stress    | Perceived psychosocial stress                                        | - Mindfulness<br>- Burnout<br>- Psychological and emotional wellbeing<br>- Productivity<br>- Acceptability and feasibility of the intervention |
| <b>Bond, Flaxman &amp; Blunce (2008); UK; Two contact centres of a large financial services organization [2]</b> | - Contact centre advisors<br>- N=181; 67% female<br>- Mean age: 33 years (SD 10)<br>- Ethnicity NA | cRCT     | 14 months            | 2 months pre-intervention and 14 months                                    | <b>I (office):</b> En/ER (steering group formed x12 team members; identified work organization problem areas and implemented change; including increased job control and meetings with team leaders to solve problems and develop training needs).<br>- <i>Delivered as a collaborative relationship between the researchers and organization members.</i><br><b>C (office):</b> Work as usual.                                                                                                                                                                                                                                                                                                                                                                                                                                                                          | Based upon the principles of participative action research | Increase job control                               | Job control (moderated by psychological flexibility)                 | - Psychological distress<br>- Absence levels<br>- Intrinsic job motivation                                                                     |
| <b>Chau et al (2015); Australia; Large telecommunication s company [3]</b>                                       | - Contact centre advisors<br>- N=31; 45% female                                                    | Q-E      | 19 weeks             | Baseline, 1, 4, and 19 weeks. Measurements conducted across the whole week | <b>I (office):</b> ER/T/P (sit-stand desk; brief training; daily e-mail reminders to stand for the first 2 weeks post installation).<br>- <i>Deliverer unclear.</i><br><b>C (office):</b> Work as usual with regular desks.                                                                                                                                                                                                                                                                                                                                                                                                                                                                                                                                                                                                                                              | -                                                          | Reduce sitting time and increase physical activity | - Work and non-work sitting<br>- Work and non-work physical activity | - Productivity                                                                                                                                 |

|                                                                                                                         |                                                                                                                                                                                                                                             |     |                               |                                                                |                                                                                                                                                                                                                                                                                                                                                                                                                                                                                                                                                                  |                                                |                                                                                   |                                                                                                                                   |                                                                                                                                                                       |
|-------------------------------------------------------------------------------------------------------------------------|---------------------------------------------------------------------------------------------------------------------------------------------------------------------------------------------------------------------------------------------|-----|-------------------------------|----------------------------------------------------------------|------------------------------------------------------------------------------------------------------------------------------------------------------------------------------------------------------------------------------------------------------------------------------------------------------------------------------------------------------------------------------------------------------------------------------------------------------------------------------------------------------------------------------------------------------------------|------------------------------------------------|-----------------------------------------------------------------------------------|-----------------------------------------------------------------------------------------------------------------------------------|-----------------------------------------------------------------------------------------------------------------------------------------------------------------------|
|                                                                                                                         | <ul style="list-style-type: none"> <li>- <b>Mean age:</b> 33 years (SD 10.8)</li> <li>- <b>Ethnicity</b> NA</li> </ul>                                                                                                                      |     |                               | (Monday-Saturday).                                             |                                                                                                                                                                                                                                                                                                                                                                                                                                                                                                                                                                  |                                                |                                                                                   |                                                                                                                                   |                                                                                                                                                                       |
| <b>Chi &amp; Lin (2009); Taiwan, China; Established under the Employment and Vocational Training Administration [4]</b> | <ul style="list-style-type: none"> <li>- Contact centre advisors (with disability)</li> <li>- <b>N</b>=22; 50% <b>female</b></li> <li>- <b>Mean age:</b> 25.6 years (range 24-55)</li> <li>- <b>Ethnicity</b> NA</li> </ul>                 | PP  | 12 months                     | 2.5, 5 and 12 months                                           | <b>I (office):</b> ER (screen filter fitted).<br>- <i>Deliverer unclear.</i>                                                                                                                                                                                                                                                                                                                                                                                                                                                                                     | -                                              | Reduce visual fatigue                                                             | Visual fatigue                                                                                                                    | -                                                                                                                                                                     |
| <b>Cook et al (2004); Australia; Newspaper contact centre [5]</b>                                                       | <ul style="list-style-type: none"> <li>- Contact centre advisors</li> <li>- <b>N</b>=59; 91.5% <b>female</b></li> <li>- <b>Mean age:</b> 39 years (range 21-68)</li> <li>- <b>Ethnicity</b> NA</li> </ul>                                   | RCT | 6 weeks                       | 1, 6 and 12 weeks                                              | <b>I (office):</b> ER/T (workstations adjusted to provide forearm support; prompt sheet given on how to maintain forearm support).<br>- <i>Delivered by researchers.</i><br><b>C (office):</b> Desks as usual, then given the intervention at 6 weeks.                                                                                                                                                                                                                                                                                                           | -                                              | Decrease neck/shoulder and wrist/hand musculoskeletal discomfort                  | Musculoskeletal discomfort                                                                                                        | <ul style="list-style-type: none"> <li>- Workstation setup</li> <li>- Working posture</li> <li>- Comfort</li> </ul>                                                   |
| <b>Garrett (2016); USA; Provide telephonic health and clinical advising [6]</b>                                         | <ul style="list-style-type: none"> <li>- Contact centre advisors</li> <li>- <b>N</b>=167; 70.7% <b>female</b></li> <li>- <b>Mean age</b> NA</li> <li>- <b>Ethnicity</b> NA</li> </ul>                                                       | Q-E | 6 months                      | Continuously over 6 months                                     | <b>I (office):</b> T/ER (training, stand-capable workstations, dual monitor set up, footrests and anti-fatigue mats installed).<br>- <i>Deliverer unclear.</i><br><b>C (office):</b> Seated at a traditional desk with dual monitor set up.                                                                                                                                                                                                                                                                                                                      | -                                              | Reduce sitting time and increase standing time at work, and increase productivity | <ul style="list-style-type: none"> <li>- Sitting time at work</li> <li>- Standing time at work</li> <li>- Productivity</li> </ul> | -                                                                                                                                                                     |
| <b>Holman et al (2009); UK; Department in a large UK company providing health insurance and health care [7]</b>         | <ul style="list-style-type: none"> <li>- Contact centre advisors, administrative employees and support section employees</li> <li>- <b>N</b>=119; 55% <b>female</b></li> <li>- <b>Mean age</b> NA</li> <li>- <b>Ethnicity</b> NA</li> </ul> | Q-E | 6 months (to fully implement) | 1-month pre intervention and 1-month after full implementation | <b>I (office):</b> En/ER/T (assessment and redesign ( <i>phase one</i> ) to identify obstacles; one day off site x3. Implementation ( <i>phase two</i> ) occurred over the next few months, with progress monitored by the team's representatives who attend progress meetings over 3 months. Design changes involved training to increase skills).<br>- <i>Delivered by the research team (facilitated phase one) and employees (led proposed initiatives).</i><br><b>C (office):</b> Serendipitous event created an inert-treatment control group (outsourcing | Job demands – resources theories of job design | Enhance job design characteristics                                                | Job-related wellbeing                                                                                                             | <ul style="list-style-type: none"> <li>- Job control</li> <li>- Decision making</li> <li>- Feedback</li> <li>- Skill utilisation</li> <li>- Task obstacles</li> </ul> |

|                                                                                                                                   |                                                                                      |     |                               |                                                                 |                                                                                                                                                                                                                                                                                                                                                                                                                                                                                                                                                                    |                                                                       |                                               |                         |                                                                                        |
|-----------------------------------------------------------------------------------------------------------------------------------|--------------------------------------------------------------------------------------|-----|-------------------------------|-----------------------------------------------------------------|--------------------------------------------------------------------------------------------------------------------------------------------------------------------------------------------------------------------------------------------------------------------------------------------------------------------------------------------------------------------------------------------------------------------------------------------------------------------------------------------------------------------------------------------------------------------|-----------------------------------------------------------------------|-----------------------------------------------|-------------------------|----------------------------------------------------------------------------------------|
|                                                                                                                                   |                                                                                      |     |                               |                                                                 | initiative, announced and introduced by management just before the assessment and redesign phase. This meant the key active ingredient of the job redesign did not occur).                                                                                                                                                                                                                                                                                                                                                                                         |                                                                       |                                               |                         |                                                                                        |
| <b>Holman &amp; Axtell (2016); UK; Department in the UK civil service dealing with transport-related issues [8]</b>               | - Contact centre advisors<br>- N=62; 56% female<br>- Mean age NA<br>- Ethnicity NA   | Q-E | 6 months (to fully implement) | 1-month pre intervention and 2 months after full implementation | <b>I (office):</b> En/ER/T (assessment and redesign ( <i>phase one</i> ) to identify obstacles; two-day workshop then 2 weeks to develop proposals for a meeting with the managers and researchers. Implementation ( <i>phase two</i> ) occurred over the next few months, with the effectiveness monitored by the teams. Design changes involved training to increase job control).<br>- <i>Delivered by the research team (facilitated phase one) and employees (led proposed initiatives).</i><br><b>C (office):</b> Active control – completed initial survey. | Multiple mediator/multiple outcome model of job redesign intervention | Change job characteristics                    | Job-related wellbeing   | - Job control and feedback<br>- Job performance<br>- Psychological contract fulfilment |
| <b>Kennedy &amp; Pretorius (2008); South Africa; Assists external company's staff with mental health/behavioural problems [9]</b> | - Contact centre advisors<br>- N=19; 78.9% female<br>- Mean age NA<br>- Ethnicity NA | PP  | NA                            | Baseline and end of the intervention                            | <b>I (office):</b> ER/Ed/P (portable heart rate variability biofeedback device; guides users by finding their unique breathing pattern so that respiration and heart rate are synchronised; points awarded for smooth waves).<br>- <i>Deliverer unclear.</i>                                                                                                                                                                                                                                                                                                       | -                                                                     | Reduce work-related stress symptoms           | Stress-related symptoms | Environmental stressors (supportive work environment and resource management).         |
| <b>Kirk et al (2013); Australia; Major metropolitan contact centre [10] (Study 1)</b>                                             | - Contact centre advisors<br>- N=214; Female NA<br>- Mean age NA<br>- Ethnicity NA   | Q-E | NA                            | 1-month pre and post-intervention                               | <b>I (office):</b> ER/T (paper-based ergonomic checklist delivered in-situ to each team member).<br>- <i>Designed by the in-house occupational health and safety officer and team leaders delivered the checklist.</i><br><b>C (office):</b> Work as usual.                                                                                                                                                                                                                                                                                                        | -                                                                     | Reduce work-related musculoskeletal disorders | Physical discomfort     | -                                                                                      |
| <b>Kirk et al (2013); Australia; Major metropolitan contact centre [10] (Study 2)</b>                                             | - Contact centre advisors<br>- N=NA; Female NA<br>- Mean age NA<br>- Ethnicity NA    | Q-E | NA                            | 1-month pre and post-intervention                               | <b>I (office):</b> T/Ed (based on a paper-based ergonomic checklist; one-on-one skill-based training session included demonstration on adjustments and positions, followed by rehearsal; training followed by an explanation of the positive effects of the training and the health consequences of common errors).<br>- <i>Delivered in-situ by the researcher.</i><br><b>C (office):</b> Work as usual.                                                                                                                                                          | -                                                                     | Reduce work-related musculoskeletal disorders | Physical discomfort     | -                                                                                      |

|                                                                                                     |                                                                                                                                                                        |      |           |                                                                                                                                         |                                                                                                                                                                                                                                                                                                                                                                                                                                                                                              |                                           |                            |                                                                    |                                                        |
|-----------------------------------------------------------------------------------------------------|------------------------------------------------------------------------------------------------------------------------------------------------------------------------|------|-----------|-----------------------------------------------------------------------------------------------------------------------------------------|----------------------------------------------------------------------------------------------------------------------------------------------------------------------------------------------------------------------------------------------------------------------------------------------------------------------------------------------------------------------------------------------------------------------------------------------------------------------------------------------|-------------------------------------------|----------------------------|--------------------------------------------------------------------|--------------------------------------------------------|
| <b>Krajewski, Wieland &amp; Sauerland (2010); Germany; Inbound contact centre [11]</b>              | - Contact centre advisors<br>- <b>N=14</b> ; 57% <b>female</b><br>- <b>Mean age:</b> 38 years<br>- <b>Ethnicity</b> NA                                                 | RCT  | 6 months  | 1 week pre-intervention (baseline) and 2, 4, and 6 months. Measurements conducted at 12:00, 13:00, 16:00, and 20:00 on assessment days. | <b>I (office):</b> ER/T (lunch break with progressive muscle relaxation; snack served, then progressive muscle relaxation in the 'silent room', wear eye masks, lie on medical daybed, instructions through headphones with calming music).<br>- <i>Delivered by researchers.</i><br><b>C (office):</b> lunch break involving small talk in company staff room with self-chosen colleagues.                                                                                                  | Systematic relaxation techniques          | Reduce stress levels       | Strain states (emotional, mental, motivational and physical)       | -                                                      |
| <b>Krajewski, Sauerland &amp; Rainer (2011); Germany; Contact centre details not available [12]</b> | - Contact centre advisors<br>- <b>N=14</b> ; 57.1% <b>female</b><br>- <b>Mean age:</b> 38.4 years<br>- 100% <b>C/W</b>                                                 | RCT  | 6 months  | 1-day per month at five time points (awakening, awakening +30 min, start of lunch break, end of lunch break, and bedtime)               | <b>I (office):</b> ER/T (lunch break with progressive muscle relaxation; snack served, then progressive muscle relaxation in the 'silent room', wear eye masks, lie on medical daybed, instructions through headphones with calming music).<br>- <i>Delivered by researchers.</i><br><b>C (office):</b> lunch break involving small talk in company staff room with self-chosen colleagues.                                                                                                  | Cognitive-behavioural model of relaxation | Reduce stress levels       | Cortisol levels (through saliva samples) to indicate stress levels | -                                                      |
| <b>Lehto et al (2003); Finland; The largest Finnish telecommunication s operator [13]</b>           | - Contact centre advisors (without severe voice problems)<br>- <b>N=48</b> ; 79% <b>female</b><br>- <b>Mean age:</b> 27.5 years (range 21-40)<br>- <b>Ethnicity</b> NA | PP   | 2 days    | Baseline and 3 weeks                                                                                                                    | <b>I (office):</b> T/Ed (vocal training on 2 days including vocal hygiene, activities and practice).<br>- <i>Delivered by a speech language therapist and speech teacher.</i>                                                                                                                                                                                                                                                                                                                | -                                         | Reduce voice failures      | Perceived vocal symptoms                                           | - Acceptability and feasibility of the intervention    |
| <b>Mishra et al (2010); India; Four different business process outsourcing companies [14]</b>       | - 23.1% managers/ admin staff, 74.2% advisors and 2.8% researchers/ analysts who smoked<br><b>N= 646</b> ;<br>19.7% <b>female</b>                                      | cRCT | 12 months | Across 18 months: regular follow up visits every 2-3 months                                                                             | <b>I1 (unclear):</b> Ed/En/P (educational health awareness sessions followed by focus group discussion to reflect on barriers to smoking cessation and to identify strengths to overcome these (7-10 employees).<br><b>I2 (unclear):</b> Ed/En/P (I1 above plus one-to-one counselling was provided to address rationalizations for continuing tobacco use at an individual level)<br><b>I3 (unclear):</b> Ed/En/P (I2 above plus bupropion was offered based on individual need assessment) | -                                         | Increase tobacco cessation | Tobacco cessation                                                  | Knowledge, attitude and practice regarding tobacco use |

|                                                                                         |                                                                                                                                                                                                                   |     |           |                                                       |                                                                                                                                                                                                                                                                                                                                                                                                                                                                                                                                                                                           |                                                                   |                                                                     |                                                                                                           |                                                                                                                                                                                                                                                                                                                                           |
|-----------------------------------------------------------------------------------------|-------------------------------------------------------------------------------------------------------------------------------------------------------------------------------------------------------------------|-----|-----------|-------------------------------------------------------|-------------------------------------------------------------------------------------------------------------------------------------------------------------------------------------------------------------------------------------------------------------------------------------------------------------------------------------------------------------------------------------------------------------------------------------------------------------------------------------------------------------------------------------------------------------------------------------------|-------------------------------------------------------------------|---------------------------------------------------------------------|-----------------------------------------------------------------------------------------------------------|-------------------------------------------------------------------------------------------------------------------------------------------------------------------------------------------------------------------------------------------------------------------------------------------------------------------------------------------|
|                                                                                         | <ul style="list-style-type: none"> <li>- <b>Mean age:</b> 23.1 years (SD 3.7)</li> <li>- <b>Ethnicity</b> NA</li> </ul>                                                                                           |     |           |                                                       | <ul style="list-style-type: none"> <li>- <i>Delivered by researchers (sessions) and expert tobacco counsellor (focus groups and one-to-one counselling).</i></li> <li><b>C (unclear):</b> Distribution of pamphlets (information on hazards of tobacco).</li> </ul>                                                                                                                                                                                                                                                                                                                       |                                                                   |                                                                     |                                                                                                           |                                                                                                                                                                                                                                                                                                                                           |
| <b>Morris et al (2021); UK; Inbound contact centre [15]</b>                             | <ul style="list-style-type: none"> <li>- Contact centre advisors</li> <li>- <b>N=59</b>; 68% <b>female</b></li> <li>- <b>Mean age:</b> 30.6 years (SD 11.5)</li> <li>- <b>Ethnicity</b> NA</li> </ul>             | RCT | 10 months | Baseline, 3 and 10 months                             | <p><b>I1 (office):</b> En/T/M/P/Ed (x4 30-min education and training sessions; stand-up champions and team leader support; self-monitoring and health check feedback provided).</p> <p><b>I2 (office):</b> ER/En/T/M/P/Ed (multicomponent intervention with height-adjustable workstations; instructions provided and reminders to stand via emails; x4 30-min education and training sessions; stand-up champions and team leader support; self-monitoring and health check feedback provided).</p> <ul style="list-style-type: none"> <li>- <i>Delivered by researchers.</i></li> </ul> | Socioecological model, the COM-B model and Behaviour Change Wheel | Reduce sitting time and increase standing and movement time at work | Sitting time at work                                                                                      | <ul style="list-style-type: none"> <li>- Feasibility and acceptability of the intervention</li> <li>Various outcomes for: <ul style="list-style-type: none"> <li>- Anthropometric</li> <li>- Behavioural</li> <li>- Cardiometabolic</li> <li>- Musculoskeletal</li> <li>- Psychosocial (wellbeing)</li> <li>- Work</li> </ul> </li> </ul> |
| <b>Morris et al (2019); UK; Inbound contact centre [16]</b>                             | <ul style="list-style-type: none"> <li>- Contact centre advisors and team leaders</li> <li>- <b>N=19</b>; 78% <b>female</b></li> <li>- <b>Mean age:</b> 39.3 years (SD 11.9)</li> <li>- 78% <b>C/W</b></li> </ul> | PP  | 8 weeks   | Baseline and 8 weeks                                  | <p><b>I (office):</b> ER/En/T/P/Ed (multicomponent intervention with height adjustable workstation; team leaders provided daily verbal support in one-to-one meetings; 1-hour education and training session week 1 and 5; weekly emails).</p> <ul style="list-style-type: none"> <li>- <i>Delivered by researchers.</i></li> </ul>                                                                                                                                                                                                                                                       | Socioecological model, the COM-B model and Behaviour Change Wheel | Reduce sitting time and increase standing and movement time at work | Acceptability and feasibility outcomes                                                                    | <ul style="list-style-type: none"> <li>Various outcomes for: <ul style="list-style-type: none"> <li>- Behavioural</li> <li>- Cardiometabolic</li> <li>- Anthropometric</li> </ul> </li> </ul>                                                                                                                                             |
| <b>Pickens et al (2016); USA; Provided telephonic health and clinical advising [17]</b> | <ul style="list-style-type: none"> <li>- Contact centre advisors</li> <li>- <b>N=138</b>; 66.7% <b>female</b></li> <li>- <b>Mean age:</b> 32.9 years</li> <li>- 22.5% <b>AA</b>, 70.3% <b>C/W</b></li> </ul>      | Q-E | 6 months  | A 2-day collection period at baseline, 3 and 6 months | <p><b>I1 (office):</b> T/ER (training; sit-to-stand workstation, dual monitor set up, anti-fatigue mats and chair with adjustable seat height - purchased by the company after consultation with the research team).</p> <p><b>I2 (office):</b> T/ER (training/ stand-biased workstation, mesh back stool and footrest - purchased by company).</p> <ul style="list-style-type: none"> <li>- <i>Delivered by managers (assigned and purchased desks to install).</i></li> <li><b>C (office):</b> Seated at a traditional desk.</li> </ul>                                                 | -                                                                 | Reduce sitting time and increase standing time at work              | <ul style="list-style-type: none"> <li>- Sitting time at work</li> <li>- Standing time at work</li> </ul> | <ul style="list-style-type: none"> <li>- Physical activity levels</li> <li>- Workstation usage</li> <li>- Acceptability and feasibility of the intervention</li> </ul>                                                                                                                                                                    |
| <b>Rempel et al (2006); USA; Large healthcare company [18]</b>                          | <ul style="list-style-type: none"> <li>- Contact centre advisors</li> <li>- <b>N=182</b>; 94% <b>female</b></li> </ul>                                                                                            | RCT | 52 weeks  | Weekly for 52 weeks                                   | <p><b>I1 (office):</b> T/ER (ergonomic training; trackball installed).</p> <p><b>I2 (office):</b> T/ER (ergonomic training; armband provided).</p> <p><b>I3 (office):</b> T/ER (ergonomic training; trackball + armband).</p> <ul style="list-style-type: none"> <li>- <i>Interventions delivered by researchers.</i></li> </ul>                                                                                                                                                                                                                                                          | -                                                                 | Prevent upper body musculoskeletal disorders                        | Pain intensity (neck/shoulders, right elbow/forearm/wrist/hand, and left elbow/forearm)                   | <ul style="list-style-type: none"> <li>- Work schedule</li> <li>- Medication uses for pain</li> <li>- Acute injury events during the week</li> </ul>                                                                                                                                                                                      |

|                                                                                                                              |                                                                                                                                                                                                          |     |          |                                |                                                                                                                                                                                                                                                                                                                                                                                                                                                                                                                                                                                                |                                                          |                                              |                                                                                                       |                                                                                                                                                                                                   |
|------------------------------------------------------------------------------------------------------------------------------|----------------------------------------------------------------------------------------------------------------------------------------------------------------------------------------------------------|-----|----------|--------------------------------|------------------------------------------------------------------------------------------------------------------------------------------------------------------------------------------------------------------------------------------------------------------------------------------------------------------------------------------------------------------------------------------------------------------------------------------------------------------------------------------------------------------------------------------------------------------------------------------------|----------------------------------------------------------|----------------------------------------------|-------------------------------------------------------------------------------------------------------|---------------------------------------------------------------------------------------------------------------------------------------------------------------------------------------------------|
|                                                                                                                              | <ul style="list-style-type: none"> <li>- <b>Mean age:</b> 40 years (SD 11.6)</li> <li>- 47.8% <b>C/W</b>, 20.9% <b>AA</b>, 17.6% <b>A/P</b>, 1.1% <b>N-A</b></li> </ul>                                  |     |          |                                | <b>C (office):</b> Ergonomic training only.                                                                                                                                                                                                                                                                                                                                                                                                                                                                                                                                                    |                                                          |                                              | m/<br>wrist/hand)                                                                                     |                                                                                                                                                                                                   |
| <b>Schneider et al (2012); Austria; One of the largest Austrian telecommunication companies [19]</b>                         | <ul style="list-style-type: none"> <li>- Contact centre advisors</li> <li>- <b>N</b>=76; 49% <b>female</b></li> <li>- <b>Mean age:</b> 29.3 years</li> <li>- <b>Ethnicity</b> NA</li> </ul>              | Q-E | 4 weeks  | Baseline and 4 weeks           | <b>I1 (office):</b> ER/Ed (biofeedback programme installed; providing real time feedback).<br><i>- Delivered by researchers.</i><br><b>C (office):</b> The control group used the biofeedback programme similarly, but the results were blinded and made visible only to the examiners.                                                                                                                                                                                                                                                                                                        | -                                                        | Improve vocal health                         | <ul style="list-style-type: none"> <li>- Vocal self-assessment</li> <li>-Vocal performance</li> </ul> | <ul style="list-style-type: none"> <li>- Vocal constitution</li> <li>- Vocal risk factors</li> </ul>                                                                                              |
| <b>Sharifi, Denesh and Gholamnia (2022); Iran; Private telecommunication company [20]</b>                                    | <ul style="list-style-type: none"> <li>- Contact centre advisors</li> <li>- <b>N</b>=84; 76% female</li> <li>- <b>Mean age:</b> 28.1 years (SD 3.69)</li> <li>- <b>Ethnicity</b> NA</li> </ul>           | PP  | 6 months | Baseline and 6 months          | <b>I (office):</b> ER/T/Ed/E (Modifications to the physical workstation, and adjustable chairs with arm rests, footrests and screen stands added to the environment; given an additional 10-minute rest break to perform an exercise program; Ergonomic skills training; visual pamphlet on ergonomic skills training; educated on the etiology of MSD; snapshots of inappropriate exercises taken to discuss potential solutions; Log to track daily exercises; researchers monitored ergonomic behaviours and tracked exercise program participation).<br><i>- Delivered by researchers.</i> | -                                                        | Reduce work-related musculoskeletal symptoms | <ul style="list-style-type: none"> <li>- Musculoskeletal symptoms</li> </ul>                          | <ul style="list-style-type: none"> <li>- Fatigue</li> <li>- Mental workload</li> </ul>                                                                                                            |
| <b>Tham (2004); Singapore; Telecommunication company [21]</b>                                                                | <ul style="list-style-type: none"> <li>- Contact centre advisors</li> <li>- <b>N</b>=56, 100% <b>female</b></li> <li>- <b>Mean age:</b> 28 years (range 25-36)</li> <li>- <b>Ethnicity</b> NA</li> </ul> | PP  | 9 weeks  | Weekly (morning and afternoon) | <b>I1 (office):</b> ER (temperature 22.5C and 51 set points (level of outdoor air supply rates)).<br><b>I2 (office):</b> ER (temperature 24.5C and 51 set points (level of outdoor air supply rates)).<br><b>I2 (office):</b> ER (temperature 22.5C and 101 set points (level of outdoor air supply rates)).<br><b>I2 (office):</b> ER (temperature 24.5C and 101 set points (level of outdoor air supply rates)).<br><i>- Deliverer unclear.</i>                                                                                                                                              | -                                                        | Reduce sick building syndrome symptoms       | Sick building syndrome symptoms                                                                       | <ul style="list-style-type: none"> <li>- Perceptions of the indoor environmental conditions</li> <li>- Self-assessed productivity</li> </ul>                                                      |
| <b>Thatcher et al (2020); South Africa; Large IT company (clients in Africa, Europe, and the Middle East) [22] (Study 1)</b> | <ul style="list-style-type: none"> <li>- Contact centre advisors</li> <li>- <b>N</b>=32; 56% <b>female</b></li> <li>- <b>Mean age:</b> 31.6 years (SD 10.8)</li> </ul>                                   | PP  | 6 weeks  | Baseline and 6 weeks           | <b>I (office):</b> ER (plant provision into the office).<br><i>- Delivered by researchers.</i>                                                                                                                                                                                                                                                                                                                                                                                                                                                                                                 | Attention Restoration Theory and Stress Reduction Theory | Improve wellbeing                            | Perceived psychological and physical wellbeing                                                        | <ul style="list-style-type: none"> <li>- Perceived productivity</li> <li>- Perceived work engagement</li> <li>- Evaluations of the work environment</li> <li>- Connectedness to nature</li> </ul> |

|                                                                                               |                                                                                                                                    |     |                                                                            |                                         |                                                                                                                                                                                                                                                                                                                                                                                                                                                                                                                                                                                                                                                                                                                                                                                                                                     |                                                          |                                                 |                                                |                                                                                                                                                                                      |
|-----------------------------------------------------------------------------------------------|------------------------------------------------------------------------------------------------------------------------------------|-----|----------------------------------------------------------------------------|-----------------------------------------|-------------------------------------------------------------------------------------------------------------------------------------------------------------------------------------------------------------------------------------------------------------------------------------------------------------------------------------------------------------------------------------------------------------------------------------------------------------------------------------------------------------------------------------------------------------------------------------------------------------------------------------------------------------------------------------------------------------------------------------------------------------------------------------------------------------------------------------|----------------------------------------------------------|-------------------------------------------------|------------------------------------------------|--------------------------------------------------------------------------------------------------------------------------------------------------------------------------------------|
|                                                                                               | - <b>Ethnicity</b> NA                                                                                                              |     |                                                                            |                                         |                                                                                                                                                                                                                                                                                                                                                                                                                                                                                                                                                                                                                                                                                                                                                                                                                                     |                                                          |                                                 |                                                |                                                                                                                                                                                      |
| <b>Thatcher et al (2020); South Africa; Small medical insurance company [22] (Study 2)</b>    | - Contact centre advisors<br>- <b>N=34</b> ; 56% <b>female</b><br>- <b>Mean age</b> : 28.9 years (SD 4.7)<br>- <b>Ethnicity</b> NA | PP  | 14 weeks                                                                   | Baseline and 14 weeks                   | <b>I (office)</b> : ER (plant provision into the office).<br>- <i>Delivered by researchers.</i>                                                                                                                                                                                                                                                                                                                                                                                                                                                                                                                                                                                                                                                                                                                                     | Attention Restoration Theory and Stress Reduction Theory | Improve performance and wellbeing               | Perceived psychological and physical wellbeing | - Perceived productivity<br>- Absenteeism<br>- Perceived work engagement<br>- Job satisfaction.<br>- Evaluations of the work environment<br>- Perceived attractiveness of the plants |
| <b>Wargocki, Wyon and Fanger (2004); Denmark; Addressed national directory enquiries [23]</b> | - Contact centre advisors<br>- <b>N=26</b> ;<br><b>Female</b> NA<br>- <b>Mean age</b> : NA<br>- <b>Ethnicity</b> NA                | PP  | Each intervention alternated weekly; each implemented twice across 8 weeks | 1-week                                  | <b>I1 (office)</b> : ER (new filter with low outdoor air supply rate).<br><b>I2 (office)</b> : ER (new filter with high outdoor air supply rate).<br><b>I2 (office)</b> : ER (used filter with high outdoor air supply rate).<br><b>I2 (office)</b> : ER (used filter with low outdoor air supply rate).<br>- <i>Deliverer unclear.</i>                                                                                                                                                                                                                                                                                                                                                                                                                                                                                             | -                                                        | Reduce sick building syndrome symptom intensity | Sick building syndrome symptom intensity       | - Perceived air quality (including acceptability measures)<br>- Environmental perceptions<br>- Self-estimated productivity                                                           |
| <b>Workman (2003); USA; Large international computer company [24]</b>                         | - Contact centre advisors<br>- <b>N=149</b> ; 44% <b>female</b><br>- <b>Mean age</b> : NA<br>- <b>Ethnicity</b> NA                 | RCT | NA                                                                         | Baseline and post-intervention          | <b>I1 (office)</b> : ER/En/In/P (alignment job redesign; employee structure and reward system aligned to organizational goals e.g. management approval and raises).<br><b>I2 (office)</b> : ER/En/T/Ed/P (high-involvement work processes; raises individual discretion and involvement in organizational development; team problem solving; mentors assigned; 1-week training programme for advisors and managers; lunch and learn participation workshops to expand knowledge of the larger work system).<br><b>I3 (office)</b> : ER/En/T/In/P (autonomous work teams; entirely group focused redistributing control and creating written contracts for roles; team measures own performance; 1-week training seminar; team-based measurements and rewards).<br>- <i>Deliverer unclear.</i><br><b>C (office)</b> : Work as usual. | Alignment theory and Cooptimized systems theory          | Improve employee job attitudes                  | Job satisfaction                               | - Task relationship orientation                                                                                                                                                      |
| <b>Workman &amp; Bommer (2004); USA; Large</b>                                                | - Contact centre advisors                                                                                                          | RCT | 6 months                                                                   | Baseline and 6 months post-intervention | <b>I1 (office)</b> : ER/En/In/P (alignment job redesign; employee structure and reward                                                                                                                                                                                                                                                                                                                                                                                                                                                                                                                                                                                                                                                                                                                                              | Alignment theory and                                     | Improve employee job attitudes                  | Job satisfaction                               | - Organizational commitment                                                                                                                                                          |

|                                                                              |                                                                                                          |    |         |                      |                                                                                                                                                                                                                                                                                                                                                                                                                                                                                                                                                                                                                                                                                                                                                                                       |                            |                      |              |                               |
|------------------------------------------------------------------------------|----------------------------------------------------------------------------------------------------------|----|---------|----------------------|---------------------------------------------------------------------------------------------------------------------------------------------------------------------------------------------------------------------------------------------------------------------------------------------------------------------------------------------------------------------------------------------------------------------------------------------------------------------------------------------------------------------------------------------------------------------------------------------------------------------------------------------------------------------------------------------------------------------------------------------------------------------------------------|----------------------------|----------------------|--------------|-------------------------------|
| international computer company [25]                                          | - N=149; 44% female<br>- Mean age: 31 years (range 21-56)<br>- Ethnicity NA                              |    |         |                      | system aligned to organizational goals e.g. management approval and raises).<br><b>I2 (office):</b> ER/En/T/Ed/P (high-involvement work processes; raises individual discretion and involvement in organizational development; team problem solving; mentors assigned; 1-week training programme for advisors and managers; lunch and learn participation workshops to expand knowledge of the larger work system).<br><b>I3 (office):</b> ER/En/T/In/P (autonomous work teams; entirely group focused redistributing control and creating written contracts for roles; team measures own performance; 1-week training seminar; team-based measurements and rewards).<br>- <i>Delivered by external consultants (organizational developers).</i><br><b>C (office):</b> Work as usual. | Cooptimized systems theory |                      |              | - Degree of group orientation |
| Yesilyurt & Yelken (2020); Turkey; Contact centre details not available [26] | - Contact centre advisors with voice problems<br>- N=13; 100% female<br>- Mean age: NA<br>- Ethnicity NA | PP | 4 weeks | Baseline and 4 weeks | <b>I (unclear):</b> Ed/T (voice therapy, vocal hygiene and diaphragm breathing training given in groups; voice exercises and laryngeal massage delivered individually; all performed x1 per week lasting 35-40 minutes).<br>- <i>Deliverer unclear.</i>                                                                                                                                                                                                                                                                                                                                                                                                                                                                                                                               | -                          | Improve vocal health | Vocal health | -                             |

Footnotes: NA: Not available; I: intervention; C: control; SD: Standard deviation; C/W: Caucasian/White; AA: African American; A/P: Asian or Pacific Islander; N-A: Native American.  
\* See online supplementary 7 for intervention study reference list.  
\*\* Study designs: RCT: Randomised controlled trial, cRCT: Clustered randomised controlled trial, Q-E: Quasi-experimental, PP: Pre-post study (within-subjects).  
\*\*\* Intervention function: T: Training, En: Enablement, P: Persuasion, Ed: Education, ER: Environmental restructuring, In: Incentivisation, M: Modelling.
